# Supplementary material for: 中西 襄 : 場の量子論, 培風館, 東京, 1975, iv+330ページ, 21.5×15cm, 3,800円 (新物理学シリーズ, 19)
Source: Royal Society of Chemistry journal article supplement (doi:10.1039/c9ra02184a), 1976-06-05
Supplement: c9ra02184a1.pdf [file c9ra02184a1.pdf]

Supporting Information

**One-step preparation of N, O co-doped 3D hierarchically porous carbon derived from soybean dregs for high-performance supercapacitors**

Guang Zhu<sup>#a</sup>, Guangzhen Zhao<sup>#a,b</sup>, Junyou Shi<sup>\*b,d</sup> and Wei Ou-Yang<sup>\*c</sup>

<sup>a</sup> Key Laboratory of Spin Electron and Nanomaterials of Anhui Higher Education Institutes, Suzhou University, Suzhou 234000, PR China.

<sup>b</sup> Energy Resources and Power Engineering College, Northeast Electric Power University, 169 Changchun Road, Jilin 132012, PR China.

<sup>c</sup> Engineering Research Center for Nanophotonics and Advanced Instrument, Ministry of Education, School of Physics and Materials Science, East China Normal University, 3663 N. Zhongshan Road, Shanghai 200062, PR China.

<sup>d</sup> Forestry College, Beihua University, 3999 East Binjiang Road, Jilin 132013, PR China.

<sup>#</sup> The first two authors contributed equally to this work.

\*Corresponding authors: bhsjy64@163.com (Junyou Shi);  
ouyangwei@phy.ecnu.edu.cn (Wei Ou-Yang), Tel/ Fax: 86-21-62233673

## **Table of contents**

### **Figures**

**Figure S1** GCD curves of carbon paper, N-O-HPC-0, N-O-HPC-1, N-O-HPC-2, and N-O-HPC-3 at the current density of 2 A g<sup>-1</sup>.

### **Tables**

**Table S1** The elemental contents of all samples obtained from XPS analysis.

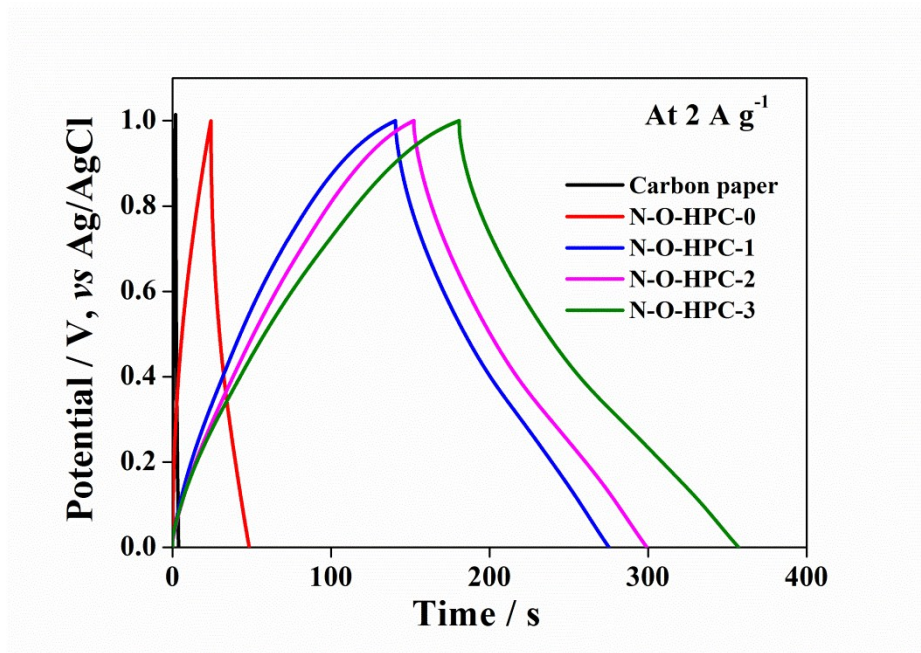

**Figure S1** GCD curves of carbon paper, N-O-HPC-0, N-O-HPC-1, N-O-HPC-2, and N-O-HPC-3 at the current density of 2 A g<sup>-1</sup>.

**Table S1** The elemental contents of all samples obtained from XPS analysis.

| Samples   | N-O-HPC-0 | N-O-HPC-1 | N-O-HPC-2 | N-O-HPC-3 |
|-----------|-----------|-----------|-----------|-----------|
| C (at. %) | 84.4      | 86.1      | 89        | 89.1      |
| O (at. %) | 10.1      | 9         | 6.2       | 6.1       |
| N (at. %) | 5.5       | 4.9       | 4.8       | 4.8       |
| N/O       | 0.54      | 0.55      | 0.77      | 0.79      |
